# Supplementary material for: Trends in Measures of Childhood Obesity in Korea From 1998 to 2012
Source: PubMed Central journal article supplement (PMC4808687; doi:10.2188/jea.je20140270), 2016-04-05
Supplement: je-26-199-s001.pdf [file je-26-199-s001.pdf]

**eTable 1.** Number of study subjects by survey year, gender, and age groups

|                                  | 1998  | 2001  | 2005  | 2007-2009 | 2010-2012 | Total  |
|----------------------------------|-------|-------|-------|-----------|-----------|--------|
| <b>Boys and girls</b>            |       |       |       |           |           |        |
| Boys and girls, aged 2-19 years  | 1,808 | 2,940 | 1,986 | 6,022     | 5,418     | 18,174 |
| Boys and girls, aged 2-9 years   |       | 1,480 | 984   | 2,865     | 2,524     | 7,853  |
| Boys and girls, aged 10-19 years | 1,808 | 1,460 | 1,002 | 3,157     | 2,894     | 10,321 |
| <b>Boys</b>                      |       |       |       |           |           |        |
| Boys, aged 2-19 years            | 917   | 1,551 | 1,022 | 3,149     | 2,854     | 9,493  |
| Boys, aged 2-9 years             |       | 795   | 497   | 1,499     | 1,338     | 4,129  |
| Boys, aged 10-19 years           | 917   | 756   | 525   | 1,650     | 1,516     | 5,364  |
| <b>Girls</b>                     |       |       |       |           |           |        |
| Girls, aged 2-19 years           | 891   | 1,389 | 964   | 2,873     | 2,564     | 8,681  |
| Girls, aged 2-9 years            |       | 685   | 487   | 1,366     | 1,186     | 3,724  |
| Girls aged 10-19 years           | 891   | 704   | 477   | 1,507     | 1,378     | 4,957  |
