# Supplementary material for: Trends in Measures of Childhood Obesity in Korea From 1998 to 2012
Source: PubMed Central journal article supplement (PMC4808687; doi:10.2188/jea.je20140270), 2016-04-05
Supplement: je-26-199-s002.pdf [file je-26-199-s002.pdf]

**eTable 2.** Trends in least square mean (standard error) values for weight and height

|                                  | 1998          | 2001          | 2005          | 2007-2009     | 2010-2012     | P for trend<br>(1998 to 2012) | P for trend<br>(2001 to 2012) |
|----------------------------------|---------------|---------------|---------------|---------------|---------------|-------------------------------|-------------------------------|
| <b>Body weight (kg)</b>          |               |               |               |               |               |                               |                               |
| Boys and girls                   |               |               |               |               |               |                               |                               |
| Boys and girls, aged 2-19 years  |               | 37.92 (0.18)  | 39.34 (0.27)  | 38.94 (0.15)  | 38.70 (0.18)  |                               | 0.015                         |
| Boys and girls, aged 2-9 years   |               | 23.68 (0.18)  | 24.02 (0.17)  | 24.27 (0.11)  | 24.11 (0.15)  |                               | 0.030                         |
| Boys and girls, aged 10-19 years | 50.77 (0.32)  | 53.44 (0.35)  | 53.89 (0.42)  | 53.31 (0.25)  | 53.11 (0.28)  | <0.0001                       | 0.252                         |
| Boys                             |               |               |               |               |               |                               |                               |
| Boys, aged 2-19 years            |               | 40.00 (0.27)  | 40.85 (0.38)  | 41.15 (0.21)  | 40.73 (0.25)  |                               | 0.034                         |
| Boys, aged 2-9 years             |               | 24.09 (0.25)  | 24.27 (0.22)  | 24.89 (0.16)  | 24.87 (0.22)  |                               | 0.003                         |
| Boys, aged 10-19 years           | 53.08 (0.41)  | 57.29 (0.55)  | 56.80 (0.61)  | 56.92 (0.34)  | 56.25 (0.39)  | <0.0001                       | 0.156                         |
| Girls                            |               |               |               |               |               |                               |                               |
| Girls, aged 2-19 years           |               | 35.64 (0.21)  | 37.63 (0.33)  | 36.46 (0.19)  | 36.45 (0.22)  |                               | 0.184                         |
| Girls, aged 2-9 years            |               | 23.18 (0.24)  | 23.74 (0.25)  | 23.59 (0.14)  | 23.29 (0.18)  |                               | 0.834                         |
| Girls aged 10-19 years           | 48.44 (0.36)  | 49.38 (0.37)  | 50.67 (0.51)  | 49.21 (0.29)  | 49.62 (0.34)  | 0.045                         | 0.624                         |
| <b>Height (cm)</b>               |               |               |               |               |               |                               |                               |
| Boys and girls                   |               |               |               |               |               |                               |                               |
| Boys and girls, aged 2-19 years  |               | 137.89 (0.21) | 139.93 (0.26) | 139.08 (0.13) | 138.48 (0.17) |                               | 0.267                         |
| Boys and girls, aged 2-9 years   |               | 117.84 (0.18) | 119.44 (0.24) | 118.62 (0.13) | 118.14 (0.15) |                               | 0.900                         |
| Boys and girls, aged 10-19 years | 158.80 (0.25) | 159.67 (0.27) | 159.96 (0.30) | 160.10 (0.17) | 160.01 (0.21) | 0.0001                        | 0.300                         |

Boys

Boys, aged 2-19 years 140.11 (0.25) 141.57 (0.33) 141.06 (0.16) 140.65 (0.21) 0.290

Boys, aged 2-9 years 118.27 (0.25) 119.71 (0.29) 119.15 (0.17) 118.81 (0.20) 0.307

Boys, aged 10-19 years 161.80 (0.33) 163.61 (0.36) 163.05 (0.44) 163.40 (0.22) 163.30 (0.27) 0.003 0.668

Girls

Girls, aged 2-19 years 135.45 (0.31) 138.08 (0.35) 136.84 (0.19) 136.08 (0.22) 0.575

Girls, aged 2-9 years 117.30 (0.24) 119.14 (0.30) 118.03 (0.16) 117.43 (0.21) 0.465

Girls aged 10-19 years 155.77 (0.28) 155.53 (0.29) 156.57 (0.34) 156.35 (0.19) 156.38 (0.21) 0.009 0.043

---
