# Supplementary material for: Trends in Measures of Childhood Obesity in Korea From 1998 to 2012
Source: PubMed Central journal article supplement (PMC4808687; doi:10.2188/jea.je20140270), 2016-04-05
Supplement: je-26-199-s003.pdf [file je-26-199-s003.pdf]

**eTable 3.** Trends in age-standardized prevalence (95% confidence intervals) of overweight and obesity among South Korean boys and girls aged 2-19

|                                        | 1998 | 2001             | 2005             | 2007-2009        | 2010-2012        | P for trend (1998 to 2012) | P for trend (2001 to 2012) |
|----------------------------------------|------|------------------|------------------|------------------|------------------|----------------------------|----------------------------|
| <b>Boys and girls, aged 2-19 years</b> |      |                  |                  |                  |                  |                            |                            |
| Obesity                                |      |                  |                  |                  |                  |                            |                            |
| IOTF                                   |      | 4.1 (3.1-5.1)    | 3.9 (2.8-5.0)    | 4.2 (3.6-4.8)    | 4.3 (3.6-5.1)    |                            | 0.851                      |
| CDC 2000                               |      | 7.9 (6.8-9.0)    | 7.2 (5.8-8.5)    | 7.7 (6.9-8.4)    | 7.4 (6.5-8.2)    |                            | 0.615                      |
| WHO MGRS                               |      | 8.8 (7.5-10.0)   | 8.0 (6.6-9.4)    | 8.3 (7.5-9.1)    | 7.9 (7.0-8.9)    |                            | 0.534                      |
| KCDC 2007                              |      | 7.9 (6.6-9.1)    | 6.7 (5.3-8.0)    | 6.9 (6.2-7.7)    | 7.3 (6.3-8.2)    |                            | 0.846                      |
| Overweight                             |      |                  |                  |                  |                  |                            |                            |
| IOTF                                   |      | 21.0 (18.9-23.0) | 19.8 (17.6-22.0) | 20.8 (19.5-22.1) | 20.5 (19.2-21.9) |                            | 0.904                      |
| CDC 2000                               |      | 22.9 (20.9-24.9) | 19.4 (17.4-21.4) | 21.0 (19.8-22.2) | 21.3 (20.0-22.7) |                            | 0.564                      |
| WHO MGRS                               |      | 27.9 (25.8-30.0) | 25.6 (23.3-27.8) | 27.0 (25.6-28.3) | 26.4 (24.9-27.9) |                            | 0.446                      |
| KCDC 2007                              |      | 19.1 (17.3-20.9) | 18.1 (16.0-20.1) | 18.5 (17.3-19.8) | 17.9 (16.6-19.3) |                            | 0.408                      |
| <b>Boys and girls, aged 2-9 years</b>  |      |                  |                  |                  |                  |                            |                            |
| Obesity                                |      |                  |                  |                  |                  |                            |                            |
| IOTF                                   |      | 4.7 (3.1-6.3)    | 3.3 (1.9-4.6)    | 5.2 (4.2-6.1)    | 5.1 (3.9-6.3)    |                            | 0.382                      |
| CDC 2000                               |      | 9.6 (7.5-11.7)   | 6.8 (5.0-8.6)    | 9.8 (8.5-11.2)   | 9.8 (8.2-11.4)   |                            | 0.427                      |
| WHO MGRS                               |      | 9.6 (7.5-11.7)   | 7.7 (5.9-9.5)    | 10.3 (9.0-11.7)  | 9.9 (8.3-11.5)   |                            | 0.320                      |
| KCDC 2007                              |      | 7.3 (5.5-9.1)    | 5.0 (3.4-6.7)    | 7.7 (6.6-8.9)    | 7.3 (5.8-8.7)    |                            | 0.563                      |

|            |  |                  |                  |                  |                  |  |       |
|------------|--|------------------|------------------|------------------|------------------|--|-------|
| Overweight |  |                  |                  |                  |                  |  |       |
| IOTF       |  | 19.1 (16.3-22.0) | 16.0 (13.5-18.6) | 19.8 (18.0-21.7) | 19.1 (17.0-21.3) |  | 0.538 |
| CDC 2000   |  | 24.6 (21.7-27.5) | 18.5 (15.9-21.2) | 24.2 (22.2-26.2) | 23.6 (21.2-26.0) |  | 0.912 |
| WHO MGRS   |  | 30.7 (27.6-33.9) | 22.8 (19.9-25.8) | 30.8 (28.7-33.0) | 29.4 (26.9-31.9) |  | 0.750 |
| KCDC 2007  |  | 18.8 (16.1-21.4) | 14.3 (11.7-16.9) | 18.6 (16.8-20.4) | 17.4 (15.3-19.4) |  | 0.921 |

---

**Boys and girls, aged 10-19 years**

|            |                  |                  |                  |                  |                  |         |       |
|------------|------------------|------------------|------------------|------------------|------------------|---------|-------|
| Obesity    |                  |                  |                  |                  |                  |         |       |
| IOTF       | 1.5 (1.0-2.0)    | 3.7 (2.6-4.8)    | 4.3 (2.8-5.8)    | 3.6 (2.9-4.4)    | 3.9 (3.0-4.8)    | 0.0001  | 0.864 |
| CDC 2000   | 3.2 (2.4-3.9)    | 7.0 (5.6-8.3)    | 7.4 (5.5-9.2)    | 6.5 (5.5-7.4)    | 6.0 (5.0-7.0)    | 0.001   | 0.088 |
| WHO MGRS   | 3.6 (2.7-4.5)    | 8.3 (6.8-9.8)    | 8.2 (6.2-10.1)   | 7.2 (6.2-8.2)    | 6.8 (5.7-7.9)    | 0.002   | 0.048 |
| KCDC 2007  | 3.9 (3.1-4.8)    | 8.2 (6.6-9.8)    | 7.6 (5.6-9.5)    | 6.5 (5.4-7.5)    | 7.3 (6.1-8.5)    | 0.002   | 0.406 |
| Overweight |                  |                  |                  |                  |                  |         |       |
| IOTF       | 14.7 (12.9-16.6) | 22.0 (19.3-24.8) | 21.9 (18.8-25.0) | 21.3 (19.7-23.0) | 21.4 (19.6-23.1) | <0.0001 | 0.574 |
| CDC 2000   | 13.0 (11.3-14.7) | 21.9 (19.3-24.4) | 19.9 (17.1-22.6) | 19.2 (17.7-20.6) | 20.1 (18.4-21.7) | <0.0001 | 0.347 |
| WHO MGRS   | 18.6 (16.5-20.7) | 26.2 (23.5-28.9) | 27.2 (24.0-30.3) | 24.8 (23.0-26.5) | 24.7 (22.9-26.4) | 0.001   | 0.106 |
| KCDC 2007  | 13.6 (11.8-15.5) | 19.3 (16.9-21.6) | 20.2 (17.3-23.1) | 18.5 (16.9-20.1) | 18.3 (16.6-19.9) | 0.005   | 0.191 |

---

CDC 2000, United States Centers for Disease Control and Prevention criteria in 2000; IOTF, International Obesity Taskforce; KCDC 2007, Korea Centers for Disease Control and Prevention criteria in 2007; WHO MGRS, World Health Organization Multicentre Growth Reference Study.

Note: Overweight includes obesity.
